# Supplementary material
Source: Royal Society of Chemistry journal article supplement (doi:10.1039/d6cp00542j)
Supplement: d6cp00542j1.pdf [file d6cp00542j1.pdf]

## Supplementary Information

### Elucidation of the structural and magnetic properties of the anion-radical salt

#### (Et-3,5-diMe-Pz)(TCNQ)<sub>2</sub>

Erik Čižmár,<sup>a\*</sup> Mariia Holub,<sup>a‡</sup> Daniela Šoltésová,<sup>a</sup> Vladimír Tkáč,<sup>a</sup> Petr Doležal,<sup>b</sup> Dominik Kriegner,<sup>b,c</sup> Václav Eigner,<sup>c</sup> Michal Dušek,<sup>c</sup> Dmitry Ziolkovskiy,<sup>d</sup> Mark W. Meisel,<sup>a,e</sup> and Alexander Feher<sup>a</sup>

<sup>a</sup> Institute of Physics, Faculty of Science, P.J. Šafárik University, Park Angelinum 9, 04001 Košice, Slovakia.

<sup>b</sup> Department of Condensed Matter Physics, Faculty of Mathematics and Physics, Charles University, Prague, Czech Republic.

<sup>c</sup> Institute of Physics of the Academy of Sciences of the Czech Republic, Prague, Czech Republic.

<sup>d</sup> Department of Chemistry, V. N. Karazin Kharkiv National University, Kharkiv, Ukraine.

<sup>e</sup> Department of Physics and National High Magnetic Field Laboratory, University of Florida, Gainesville, FL 32611-8440, USA.

<sup>‡</sup> Present address: Faculty of Physics and Applied Computer Science, AGH University of Krakow, al. A. Mickiewicza 30, 30-059 Kraków, Poland.

\*[erik.cizmar@upjs.sk](mailto:erik.cizmar@upjs.sk)

Table S1 Crystal data for (Et-3,5-di-Me-Pz)(TCNQ)<sub>2</sub> (**1**).

| <b>phase</b>                                                              | <b>HT</b>                                                                                        | <b>LT</b>                                                                                        |
|---------------------------------------------------------------------------|--------------------------------------------------------------------------------------------------|--------------------------------------------------------------------------------------------------|
| Empirical formula                                                         | 2(C <sub>12</sub> H <sub>4</sub> N <sub>4</sub> ), C <sub>8</sub> H <sub>13</sub> N <sub>2</sub> | 2(C <sub>12</sub> H <sub>4</sub> N <sub>4</sub> ), C <sub>8</sub> H <sub>13</sub> N <sub>2</sub> |
| Formula weight                                                            | 545.6                                                                                            | 545.6                                                                                            |
| <i>T</i> (K)                                                              | 250                                                                                              | 95                                                                                               |
| $\lambda$ (Å)                                                             | 1.54184                                                                                          | 1.54184                                                                                          |
| Crystal system                                                            | Triclinic                                                                                        | Triclinic                                                                                        |
| Space group                                                               | <i>P</i> -1                                                                                      | <i>P</i> -1                                                                                      |
| <i>a</i> (Å)                                                              | 7.9282(2)                                                                                        | 7.8658(3)                                                                                        |
| <i>b</i> (Å)                                                              | 13.3615(4)                                                                                       | 13.1568(5)                                                                                       |
| <i>c</i> (Å)                                                              | 14.0733(4)                                                                                       | 13.8695(4)                                                                                       |
| $\alpha$ (°)                                                              | 92.407(2)                                                                                        | 89.380(3)                                                                                        |
| $\beta$ (°)                                                               | 78.061(2)                                                                                        | 76.884(3)                                                                                        |
| $\gamma$ (°)                                                              | 77.177(2)                                                                                        | 80.584(3)                                                                                        |
| <i>V</i> (Å <sup>3</sup> )                                                | 1416.15(7)                                                                                       | 1378.54(9)                                                                                       |
| <i>Z</i>                                                                  | 2                                                                                                | 2                                                                                                |
| <i>D</i> <sub>calc</sub> (g.cm <sup>-3</sup> )                            | 1.280                                                                                            | 1.314                                                                                            |
| $\mu$ (mm <sup>-1</sup> )                                                 | 0.65                                                                                             | 0.67                                                                                             |
| <i>F</i> (000)                                                            | 566                                                                                              | 566                                                                                              |
| $\vartheta_{\min}, \vartheta_{\max}$ (°)                                  | 4.5, 75.7                                                                                        | 4.6, 75.9                                                                                        |
| Refl. Collected                                                           | 24690                                                                                            | 22247                                                                                            |
| Refl. Indep., <i>R</i> <sub>int</sub>                                     | 5778, 0.051                                                                                      | 5604, 0.033                                                                                      |
| Refl. Observed                                                            | 4554                                                                                             | 4634                                                                                             |
| Ref. param., restr.                                                       | 387, 4                                                                                           | 380, 0                                                                                           |
| GOF                                                                       | 1.81                                                                                             | 1.71                                                                                             |
| <i>R</i> <sub>1</sub> [ <i>I</i> > 3 $\sigma$ ( <i>I</i> )]               | 0.048                                                                                            | 0.040                                                                                            |
| <i>wR</i> <sub>2</sub> [ <i>I</i> > 3 $\sigma$ ( <i>I</i> )]              | 0.130                                                                                            | 0.108                                                                                            |
| <i>R</i> <sub>1</sub> (all data)                                          | 0.058                                                                                            | 0.047                                                                                            |
| <i>wR</i> <sub>2</sub> (all data)                                         | 0.138                                                                                            | 0.112                                                                                            |
| $\Delta\rho_{\min}, \Delta\rho_{\max}$ (e <sup>-</sup> .Å <sup>-3</sup> ) | -0.28, 0.25                                                                                      | -0.27, 0.27                                                                                      |

Table S2 Selected bond lengths in crystal structures of **1**.

| <b>Phase</b> | <b>HT</b>  | <b>LT</b>  |
|--------------|------------|------------|
| X–Y          | X–Y (Å)    | X–Y (Å)    |
| C1a–C2a      | 1.434(2)   | 1.4413(17) |
| C1a–C6a      | 1.437(2)   | 1.4433(18) |
| C1a–C7a      | 1.3947(17) | 1.3898(14) |
| C2a–C3a      | 1.3526(17) | 1.3537(14) |
| C3a–C4a      | 1.4329(19) | 1.4404(17) |
| C4a–C5a      | 1.438(2)   | 1.4444(17) |
| C4a–C10a     | 1.3879(16) | 1.3868(14) |
| C5a–C6a      | 1.3497(16) | 1.3545(14) |
| C7a–C8a      | 1.424(2)   | 1.4322(18) |
| C7a–C9a      | 1.423(2)   | 1.4314(17) |
| C10a–C11a    | 1.427(2)   | 1.4325(17) |
| C10a–C12a    | 1.423(2)   | 1.4294(18) |
| C1b–C2b      | 1.4354(19) | 1.4361(16) |

|           |            |            |
|-----------|------------|------------|
| C1b–C6b   | 1.4326(19) | 1.4341(17) |
| C1b–C7b   | 1.3950(16) | 1.4011(14) |
| C2b–C3b   | 1.3578(16) | 1.3614(14) |
| C3b–C4b   | 1.4328(19) | 1.4310(17) |
| C4b–C5b   | 1.433(2)   | 1.4349(16) |
| C4b–C10b  | 1.4006(17) | 1.4071(14) |
| C5b–C6b   | 1.3540(16) | 1.3613(14) |
| C7b–C8b   | 1.422(2)   | 1.4263(17) |
| C7b–C9b   | 1.424(2)   | 1.4279(17) |
| C10b–C11b | 1.419(2)   | 1.4245(17) |
| C10b–C12b | 1.424(2)   | 1.4247(18) |

Table S3 The shortest C...C interactions between anion-radicals in **1**.

| Phase                   | HT              |                         | LT              |
|-------------------------|-----------------|-------------------------|-----------------|
| C(x)···C(y)             | C(x)···C(y) (Å) | C(x)···C(y)             | C(x)···C(y) (Å) |
| C9a···C10a <sup>i</sup> | 3.545(2)        | C9a···C10a <sup>i</sup> | 3.4324(15)      |
| C10a···C4b              | 3.2060(17)      | C1a···C7b               | 3.1846(14)      |
| C2b···C6b <sup>ii</sup> | 3.3985(18)      | C1b···C3b <sup>ii</sup> | 3.2581(15)      |

Symmetry codes: (i) -x, 2-y, 1-z; (ii) 1-x, 1-y, 1-z.

Table S4 Possible weak hydrogen bonds in **1** at 250 K (HT).

| D-H···A                                                       | D-H (Å)    | H···A (Å)  | D···A (Å)  | ∠(D-H···A) (°) |
|---------------------------------------------------------------|------------|------------|------------|----------------|
| C3a- H1c3a···N2a <sup>i</sup>                                 | 0.9600(14) | 2.5438(17) | 3.2224(22) | 127.770(88)    |
| C3b- H1c3b ···N2b <sup>i</sup>                                | 0.9600(14) | 2.7553(16) | 3.3868(22) | 123.987(83)    |
| C5a <sup>i</sup> - H1c5a <sup>i</sup> ···N3a                  | 0.9600(14) | 2.8127(15) | 3.4098(21) | 121.154(87)    |
| C6a <sup>i</sup> - H1c6a <sup>i</sup> ···N3a                  | 0.9599(14) | 2.7263(16) | 3.3713(22) | 125.120(89)    |
| C5b <sup>i</sup> - H1c5b <sup>i</sup> ···N3b                  | 0.9600(14) | 2.8407(15) | 3.4271(21) | 120.318(87)    |
| C6b <sup>i</sup> - H1c6b <sup>i</sup> ···N3b                  | 0.9600(14) | 2.7598(16) | 3.3868(22) | 123.597(86)    |
| C1c <sup>ii</sup> -H1c1c <sup>ii</sup> ···N1a                 | 0.9599(14) | 2.6644(15) | 3.3829(20) | 132.017(101)   |
| C1c <sup>iii</sup> - H1c1c <sup>iii</sup> ···N1a <sup>i</sup> |            |            |            |                |
| C5c <sup>iv</sup> -H1c5c <sup>iv</sup> ···N3b                 | 0.9599(14) | 2.5428(16) | 3.3416(43) | 140.730(205)   |
| C5c <sup>v</sup> -H1c5c <sup>v</sup> ···N3b <sup>i</sup>      |            |            |            |                |
| *C5c <sup>iv</sup> -*H2c5c <sup>iv</sup> ···N3b               | 0.9603(96) | 2.4877(16) | 3.3511(95) | 149.560(512)   |
| *C5c <sup>v</sup> -*H2c5c <sup>v</sup> ···N3b <sup>i</sup>    |            |            |            |                |
| C4c-H1c4c···N4b                                               | 0.9599(18) | 2.3253(19) | 3.4038(28) | 138.452(113)   |
| C4c <sup>i</sup> -H1c4c <sup>i</sup> ···N4b <sup>i</sup>      |            |            |            |                |
| *C5c-*H1c5c···N4b                                             | 0.9604(83) | 2.5176(15) | 3.3275(69) | 142.011(426)   |
| *C5c <sup>i</sup> -*H1c5c <sup>i</sup> ···N4b <sup>i</sup>    |            |            |            |                |
| C8c <sup>vi</sup> -H1c8c <sup>vi</sup> ···N4b                 | 0.9599(28) | 2.7572(15) | 3.6311(31) | 151.719(159)   |
| C8c <sup>iv</sup> -H1c8c <sup>iv</sup> ···N4b <sup>i</sup>    |            |            |            |                |

Symmetry codes: (i) 1+x, y, z; (ii) -1+x, 1+y, 1+z; (iii) x, 1+y, 1+z; (iv) 2-x, 1-y, -z; (v) 3-x, 1-y, -z; (vi) 1-x, 1-y, -z. \*position occupied with 0.335 probability.

Table S5 Possible weak hydrogen bonds in **1** at 95 K (LT).

| D-H...A                                                        | D-H (Å)    | H...A (Å)  | D...A (Å)  | ∠(D-H...A) (°) |
|----------------------------------------------------------------|------------|------------|------------|----------------|
| C2a- H1c2a...N2a <sup>i</sup>                                  | 0.9600(12) | 2.6566(11) | 3.2637(17) | 121.594(72)    |
| C3a- H1c3a...N2a <sup>i</sup>                                  | 0.9600(12) | 2.5495(12) | 3.2136(17) | 126.410(71)    |
| C2b- H1c2b ...N2b <sup>i</sup>                                 | 0.9599(12) | 2.6739(11) | 3.3032(17) | 123.586(71)    |
| C3b- H1c3b ...N2b <sup>i</sup>                                 | 0.9600(12) | 2.6447(12) | 3.2920(17) | 125.125(71)    |
| C5a <sup>i</sup> - H1c5a <sup>i</sup> ...N3a                   | 0.9601(12) | 2.7052(11) | 3.3422(17) | 124.343(71)    |
| C6a <sup>i</sup> - H1c6a <sup>i</sup> ...N3a                   | 0.9600(12) | 2.7226(12) | 3.3537(17) | 123.871(71)    |
| C5b <sup>i</sup> - H1c5b <sup>i</sup> ...N3b                   | 0.9599(12) | 2.6952(11) | 3.3328(17) | 124.383(71)    |
| C6b <sup>i</sup> - H1c6b <sup>i</sup> ...N3b                   | 0.9600(12) | 2.7082(11) | 3.3419(17) | 124.058(71)    |
| C1c <sup>ii</sup> -H1c1c <sup>ii</sup> ...N1a                  | 0.9600(11) | 2.7053(11) | 3.3596(14) | 125.929(71)    |
| C1c <sup>iv</sup> - H1c1c <sup>iv</sup> ...N1a <sup>i</sup>    |            |            |            |                |
| C1c <sup>iii</sup> -H1c1c <sup>iii</sup> ...N1a                | 0.9600(11) | 2.7383(11) | 3.3609(16) | 123.157(74)    |
| C1c <sup>v</sup> - H1c1c <sup>v</sup> ...N1a <sup>i</sup>      |            |            |            |                |
| C8c <sup>vi</sup> -H3c8c <sup>vi</sup> ...N2b                  | 0.9600(13) | 2.7456(11) | 3.5623(17) | 143.362(76)    |
| C8c <sup>iii</sup> -H3c8c <sup>iii</sup> ...N2b <sup>i</sup>   |            |            |            |                |
| C5c <sup>vii</sup> -H2c5c <sup>vii</sup> ...N3b                | 0.9599(13) | 2.5732(11) | 3.4213(16) | 147.404(76)    |
| C5c <sup>viii</sup> -H2c5c <sup>viii</sup> ...N3b <sup>i</sup> |            |            |            |                |
| C4c-H1c4c...N4b                                                | 0.9599(12) | 2.4902(12) | 3.1978(17) | 130.469(74)    |
| C4c <sup>i</sup> -H1c4c <sup>i</sup> ...N4b <sup>i</sup>       |            |            |            |                |
| C8c <sup>ix</sup> -H1c8c <sup>ix</sup> ...N4b                  | 0.9601(13) | 2.6410(11) | 3.4939(16) | 148.211(78)    |
| C8c <sup>vii</sup> -H1c8c <sup>vii</sup> ...N4b <sup>i</sup>   |            |            |            |                |

Symmetry codes: (i) 1+x, y, z; (ii) -1+x, 1+y, 1+z; (iii) 1-x, 1-y, 1-z; (iv) x, 1+y, 1+z; (v) 2-x, 1-y, 1-z; (vi) x, 1-y, 1-z; (vii) 2-x, 1-y, -z; (viii) 3-x, 1-y, z; (ix) 1-x, 1-y, -z;.

Table S6 Analysis of the TCNQ bond distances and correlation between bond length and charge of TCNQ molecules in **1** using the Kistenmacher relationship.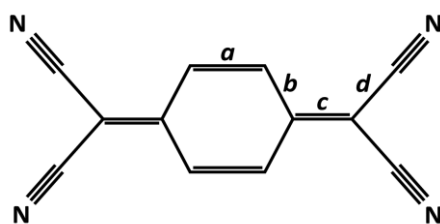

|                      | <i>a</i> | <i>b</i> | <i>c</i> | <i>d</i> | <i>b - c</i> | <i>c - d</i> | <i>c/(b + d)</i> | <i>Q</i> |
|----------------------|----------|----------|----------|----------|--------------|--------------|------------------|----------|
| TCNQ <sup>0</sup>    | 1.345    | 1.448    | 1.374    | 1.441    | 0.074        | -0.067       | 0.476            | 0.001    |
| TCNQ <sup>-0.5</sup> | 1.354    | 1.434    | 1.396    | 1.428    | 0.040        | -0.032       | 0.488            | 0.500    |
| TCNQ <sup>-</sup>    | 1.374    | 1.423    | 1.420    | 1.416    | 0.003        | 0.004        | 0.500            | 0.999    |
| <b>250 K</b>         |          |          |          |          |              |              |                  |          |
| TCNQ A               | 1.354    | 1.433    | 1.399    | 1.423    | 0.035        | -0.024       | 0.490            | 0.571    |
| TCNQ B               | 1.351    | 1.433    | 1.391    | 1.425    | 0.042        | -0.033       | 0.487            | 0.451    |
| <b>95 K</b>          |          |          |          |          |              |              |                  |          |
| TCNQ A               | 1.362    | 1.433    | 1.405    | 1.426    | 0.028        | -0.022       | 0.492            | 0.637    |
| TCNQ B               | 1.355    | 1.442    | 1.388    | 1.432    | 0.057        | -0.044       | 0.483            | 0.295    |

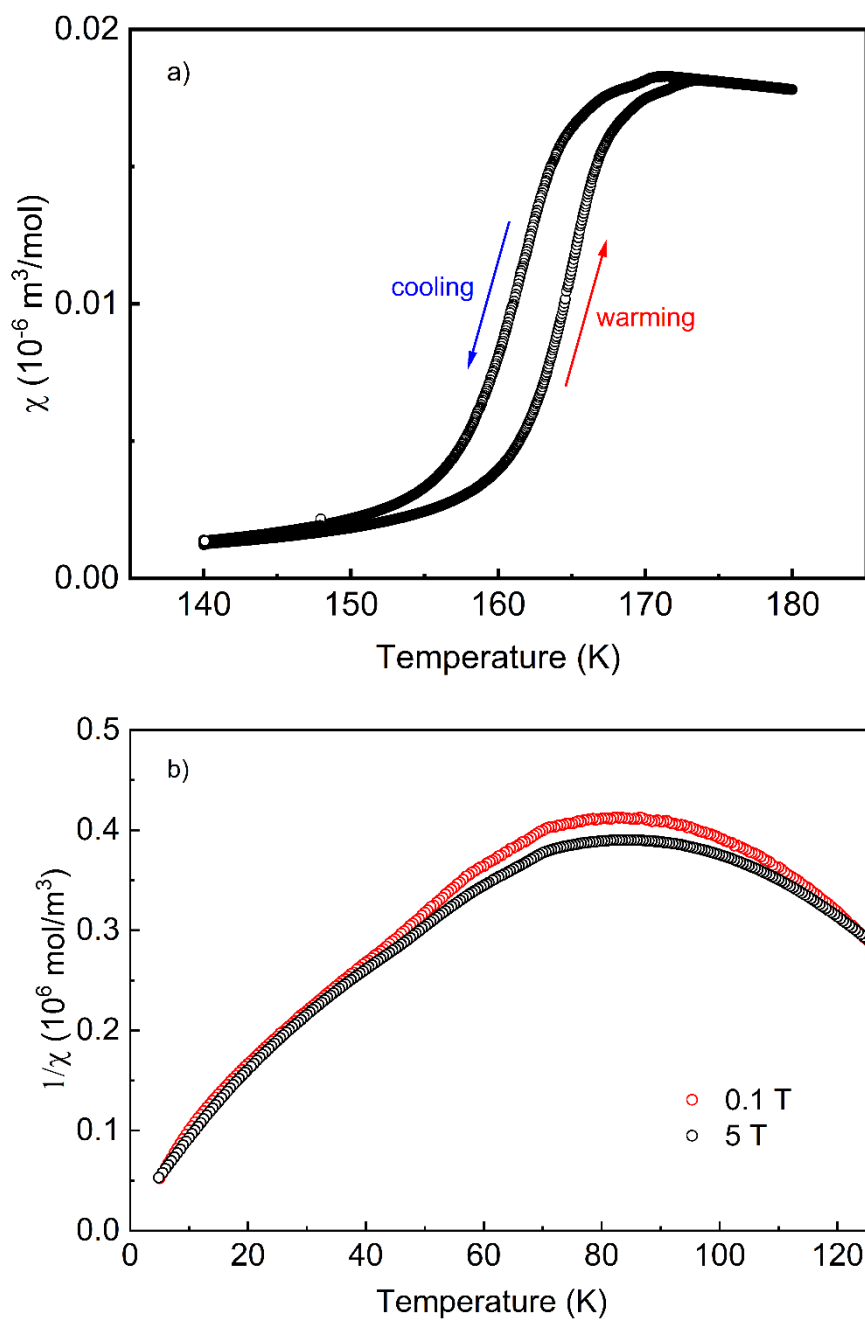

Figure S1 a) The magnetic response of **1** during thermal cycling in the magnetic field of 5 T. b) Inverse susceptibility (calculated as  $M/H$ ) measured in cooling mode in the LT phase.

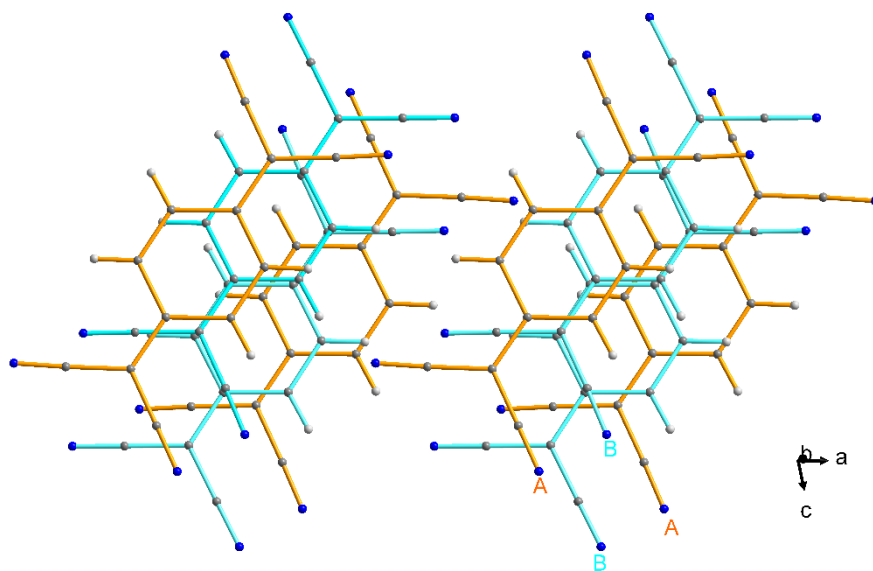

Figure S2 View of the TCNQ stacks along the  $b^*$ -axis (perpendicular to the  $ac$ -plane) as used for the measurements of resistivity.

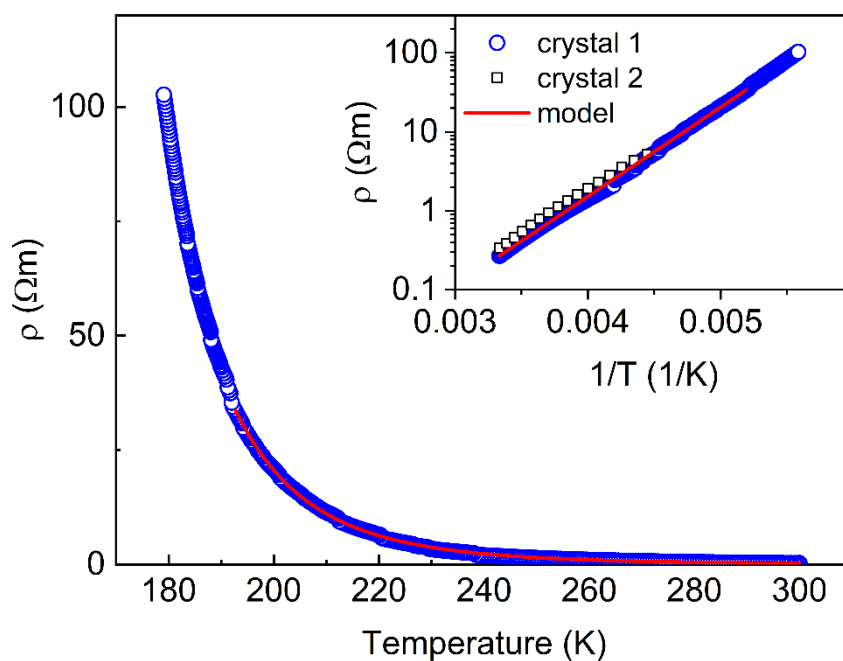

Figure S3 Temperature dependence of the resistivity of a crystal of **1** (blue and black open symbols for two different crystals in a similar measurement geometry), measured in a cooling cycle, showing semiconducting behaviour in the HT phase (red solid line). The inset shows the resistivity in the Arrhenius plot.

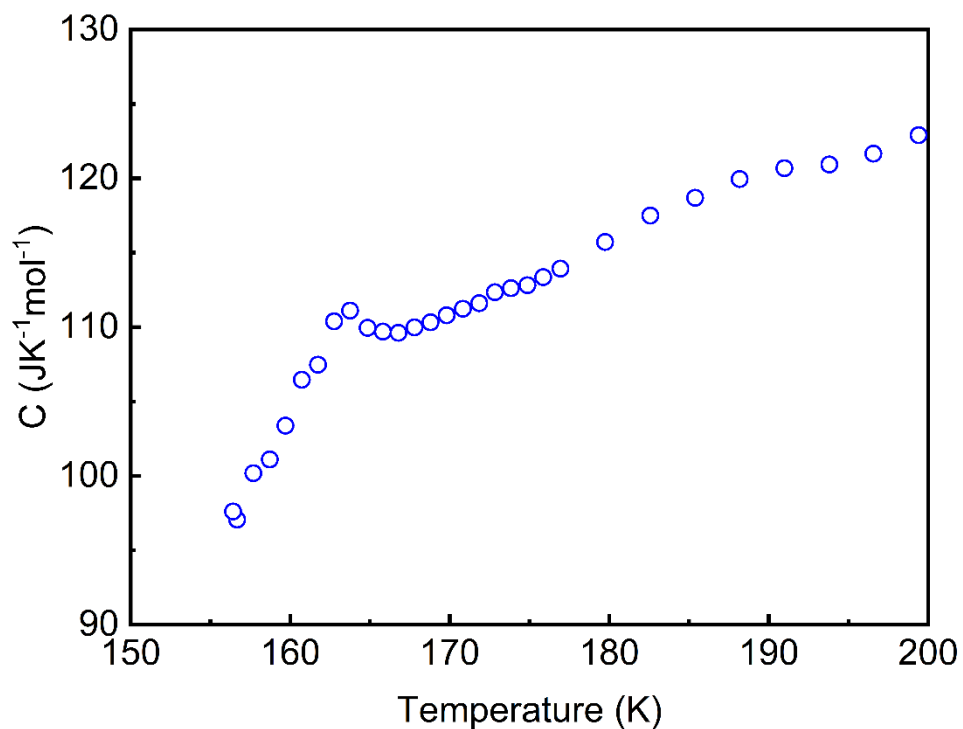

Figure S4 Temperature dependence of specific heat of **1** in zero magnetic field measured in a cooling cycle.

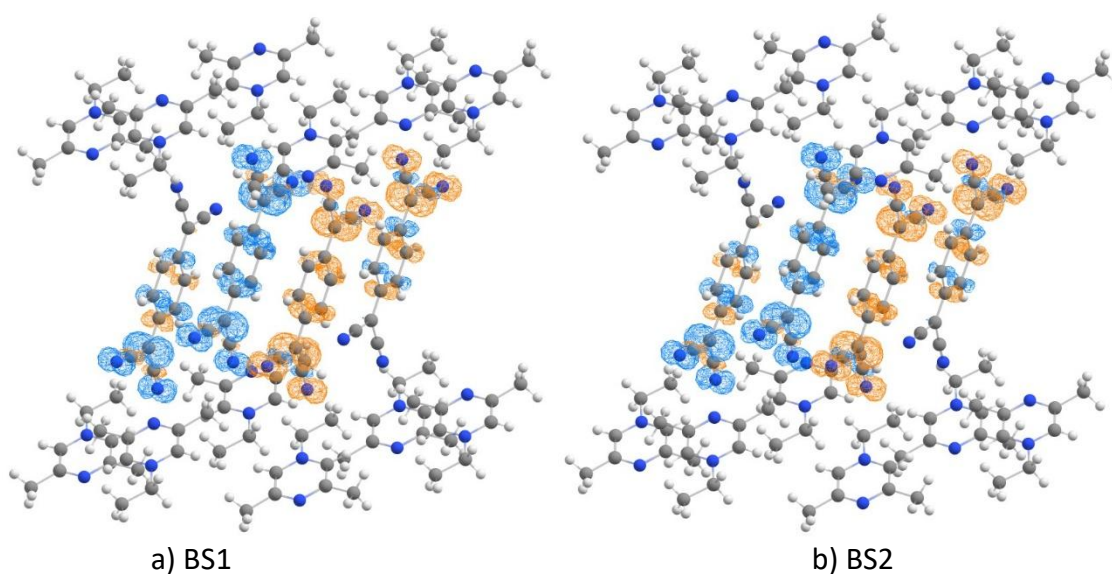

Figure S5 The spin density of the BS states of two large model molecules (**1m**, Table 3) with four TCNQ anion radicals surrounded by twelve nearest cations extracted from the crystal structure of **1** obtained at 95 K. The blue and orange colours of the spin density distribution correspond to the two opposite spin polarisations (isovalue 0.002). Exchange interactions  $J_1$  (corresponding to AB-BA interaction, BS1) and  $J_2$  (corresponding to BA-AB interaction, BS2) were calculated using the BS DFT approach.

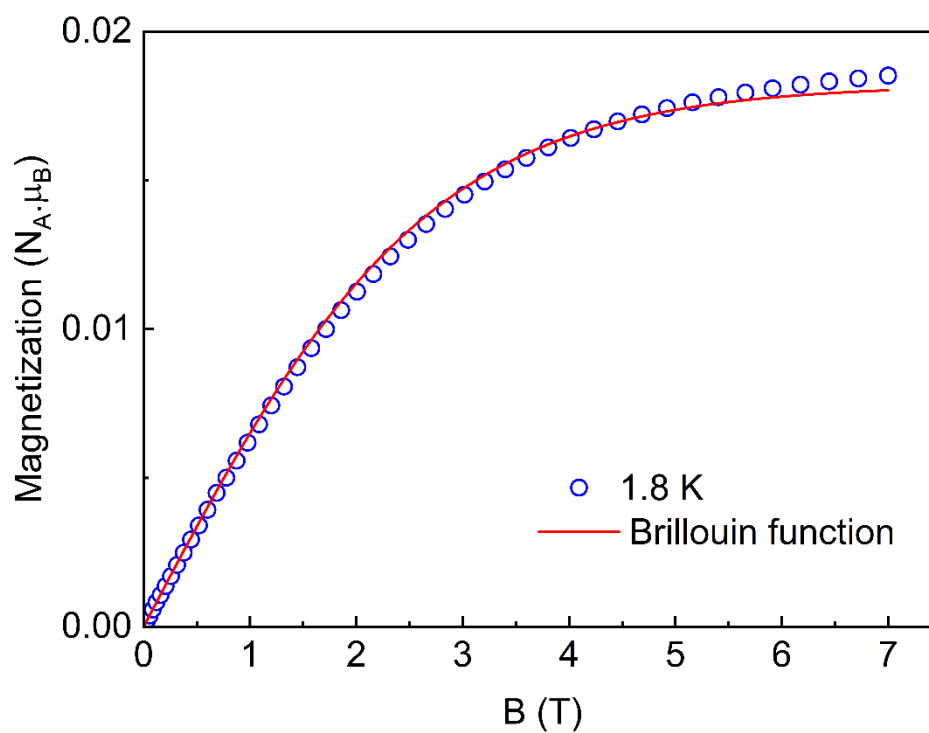

Figure S6 Field dependence of magnetisation of **1** at 1.8 K (blue open symbols); the solid red line represents the fit of the Brillouin function taking into account the existence of paramagnetic spins with concentration of  $\rho = 0.018$ .
